# Supplementary material for: Manganese(ii) coordination polymers with mixed azide and pyridylbenzoate N-oxide ligands: structures and magnetism
Source: Royal Society of Chemistry journal article supplement (doi:10.1039/c1dt11692d), 2011-12-20
Supplement: c1dt11692d.pdf [file c1dt11692d.pdf]

## Electronic supplementary information (ESI)

# Manganese(II) coordination polymers with mixed azide and pyridylbenzoate *N*-oxide ligands: structures and magnetism

Xiu-Mei Zhang, Yan-Qin Wang, Xiu-Bing Li, and En-Qing Gao\*

Table S1 Hydrogen bond lengths (Å) and angles (°) for Compound 2<sup>a</sup>.

| D-H...A           | d(D-H)  | d(H...A) | d(D...A) | <(DHA)  |
|-------------------|---------|----------|----------|---------|
| O9-H9A... O8#6    | 0.84(2) | 1.96(4)  | 2.766(6) | 161(8)  |
| O9-H9B... O13     | 0.86(2) | 1.97(5)  | 2.782(9) | 158(11) |
| O10-H10B... O5#2  | 0.85(2) | 1.94(4)  | 2.672(7) | 143(6)  |
| O10-H10C... O4#7  | 0.86(2) | 2.08(4)  | 2.795(7) | 139(6)  |
| O11-H11B... O13#8 | 0.83(2) | 2.38(8)  | 2.91(1)  | 123(7)  |
| O11-H11C... O8#6  | 0.86(2) | 2.22(2)  | 2.990(7) | 149(5)  |
| O12-H12A... O4#7  | 0.87(2) | 2.05(7)  | 2.796(7) | 144(10) |
| O12-H12B... O5#4  | 0.87(2) | 2.29(9)  | 2.924(8) | 129(9)  |
| O13-H13B... O5#9  | 0.87(2) | 2.07(9)  | 2.81(1)  | 143(1)  |
| O13-H13C... N9    | 0.90(2) | 2.01(3)  | 2.90(1)  | 167(10) |

Symmetry codes: #1 -x+3/2,y+0,z+1/2; #2 -x+1,-y+1/2,z-1/2; #3 -x+2,-y,z;  
#4 -x+3/2,y+0,z-1/2; #5 -x+1,-y+1/2,z+1/2; #6 x-1/2,-y+0,z+1/2;  
#7 x+1/2,-y+1/2,z ; #8 -x+1,-y,z ; #9 -x+1/2,y+0,z-1/2.

<sup>a</sup>D, donor; A, acceptor.
